# Supplementary material for: Epidemiology of COVID-19 Among Children in China
Source: Oxford University Press journal article supplement (doi:10.1542/peds.2020-0702), 2020-03-16
Supplement: peds_20200702supplementarydata.pdf [file peds_20200702supplementarydata.pdf]

## Supplemental Information

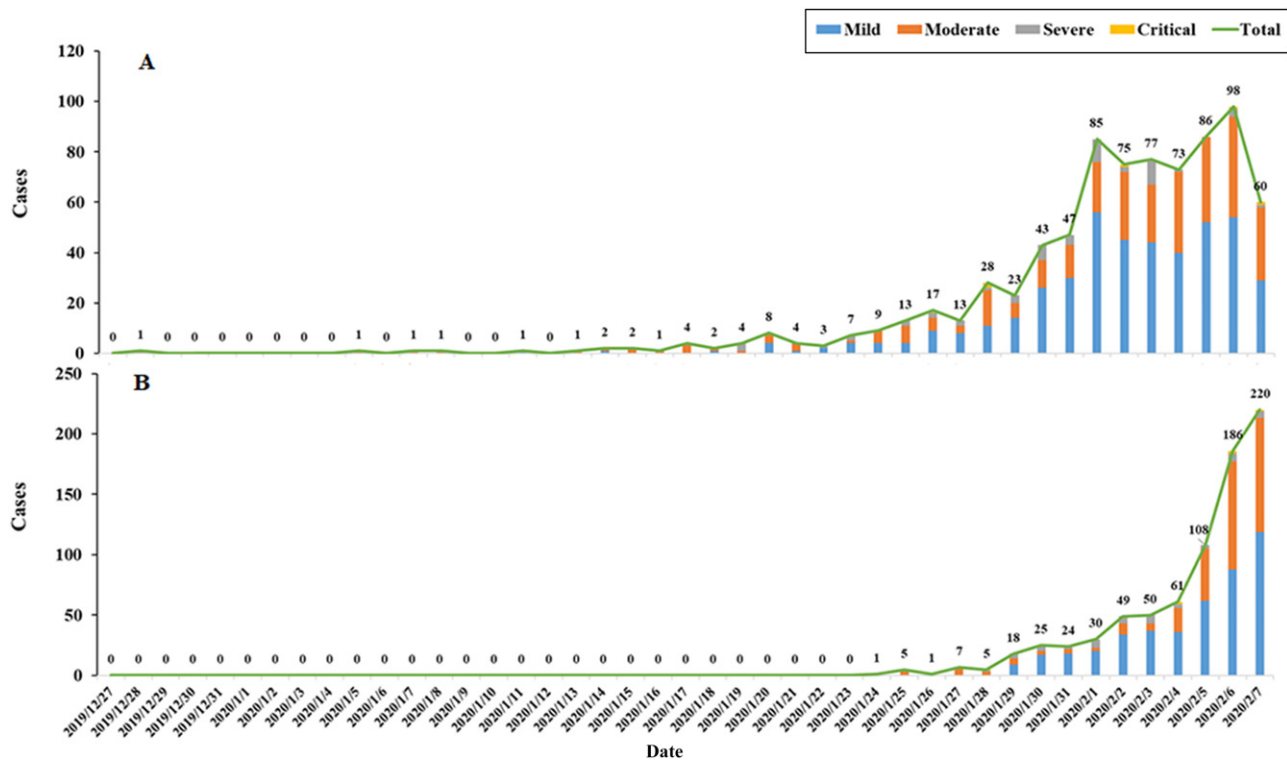

### SUPPLEMENTAL FIGURE 6

Onset and diagnosis dates of 790 suspected male children's COVID-19 cases in China. A, Onset date. B, Diagnosis date.

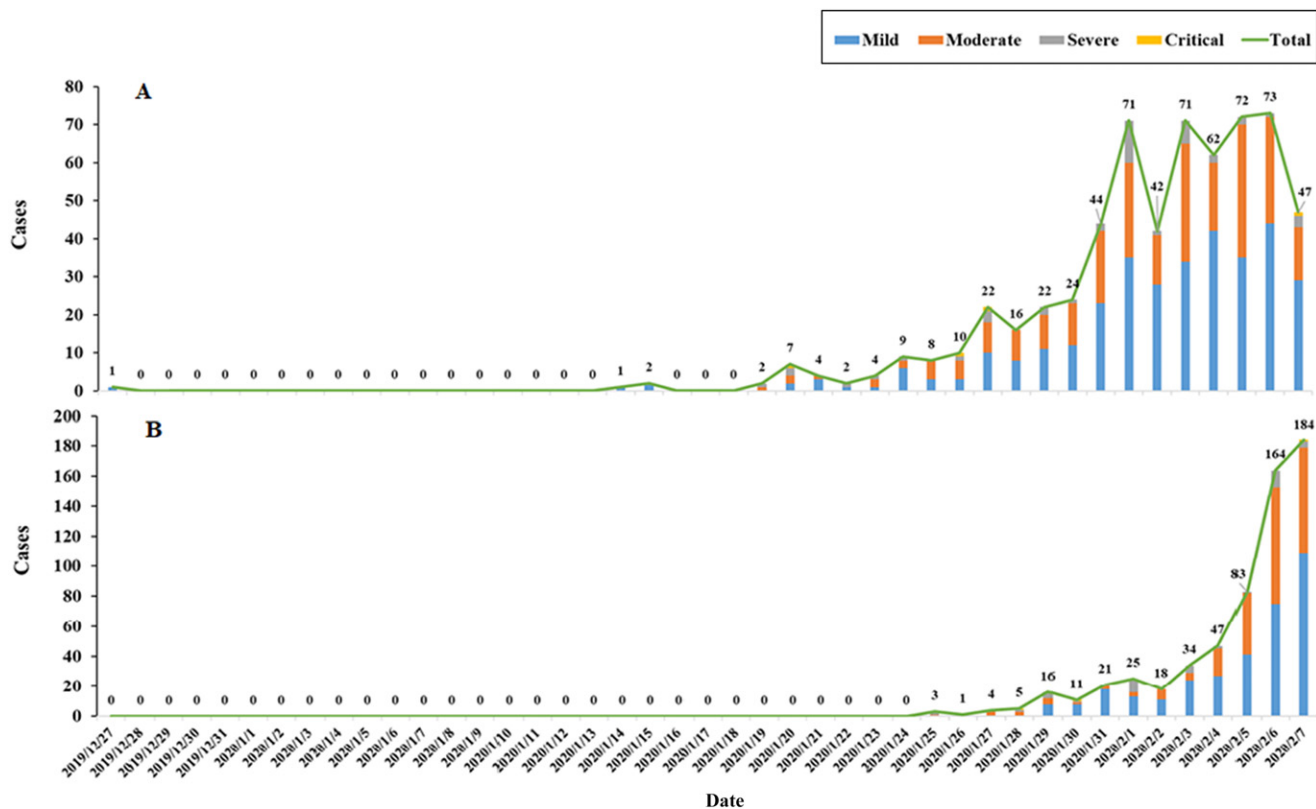

**SUPPLEMENTAL FIGURE 7**

Onset and diagnosis dates of 617 suspected female children's COVID-19 cases in China. A, Onset date. B, Diagnosis date.

**Supplemental Table 3** Severity by Age, Restricted Only to Confirmed Cases

| Age Group, y <sup>a</sup> | Asymptomatic | Mild       | Moderate   | Severe   | Critical | Total      |
|---------------------------|--------------|------------|------------|----------|----------|------------|
| <1                        | 7            | 51         | 20         | 5        | 2        | 85 (11.7)  |
| 1–5                       | 15           | 58         | 61         | 3        | 0        | 137 (18.8) |
| 6–10                      | 30           | 76         | 62         | 1        | 0        | 169 (23.2) |
| 11–15                     | 27           | 70         | 81         | 2        | 0        | 180 (24.8) |
| >15                       | 15           | 59         | 74         | 7        | 1        | 156 (21.5) |
| Total                     | 94 (12.9)    | 314 (43.2) | 298 (41.0) | 18 (2.5) | 3 (0.4)  | 727 (100)  |

Data are presented as *n* (%).

<sup>a</sup> One case had missing values.
